# Supplementary material for: N-Doped Graphene Quantum Dot Nanoparticle Synthesis of Optical Active Thermal Stable Polyurea Nanocomposites Using Polybutadiene Chain Modification
Source: Hindawi journal article supplement (doi:10.1155/2022/2426749), 2022-10-14
Supplement: f1 [file 2426749.f1.docx]

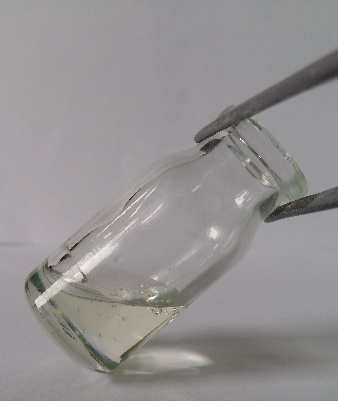
**Fig. S1** Telechelic aldehyde functionalized polybutadiene (Ald) product image


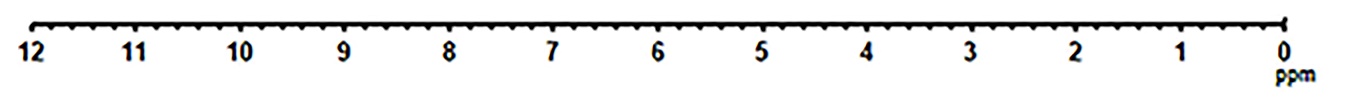

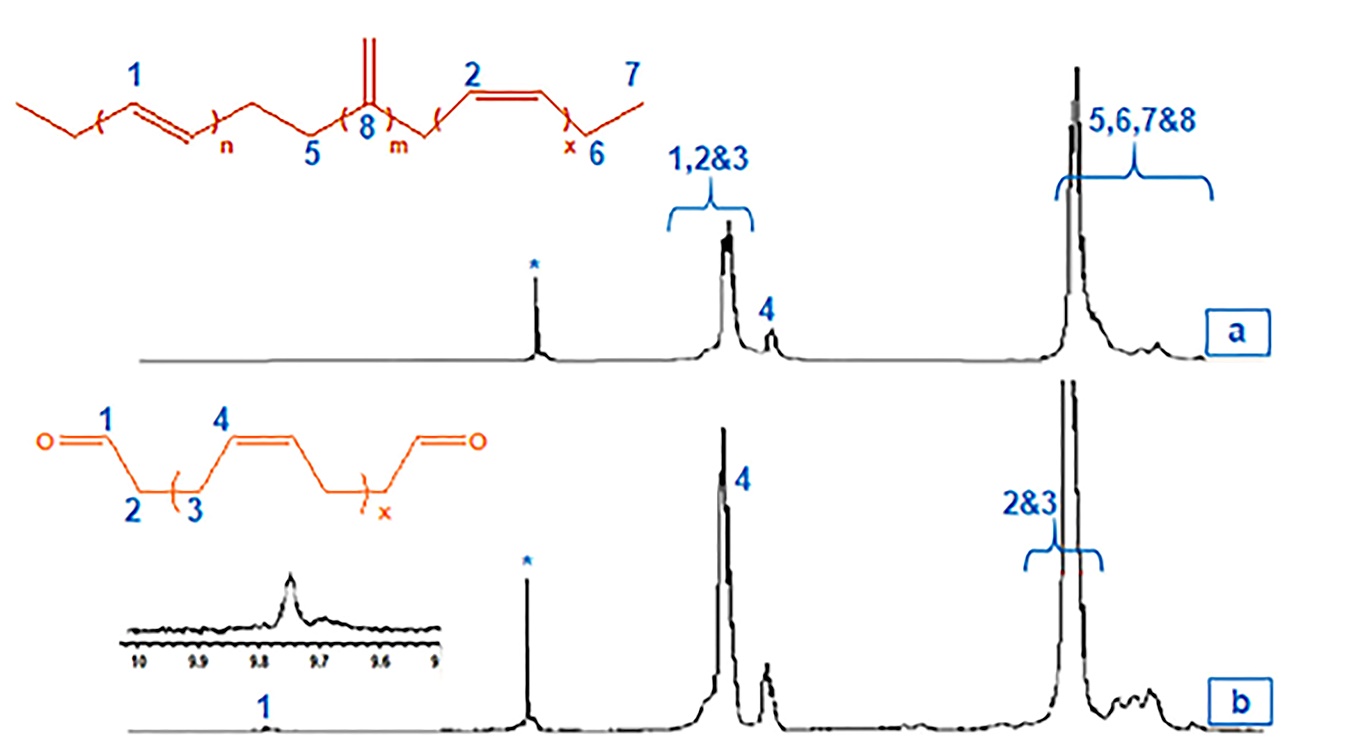


**Fig. S2.** 1H-NMR spectra. (a) PB, (b) Ald

As it is shown in Fig. S2a, peaks between 4.8- 5.8 ppm are designated to cis-, trans- and vinyl protons. Multiple CH2 and CH3 proton peaks are broad below 2.2 ppm in starting PB spectrum and this pattern is remained steady in all other spectra. Aldehyde indicating proton peak is appeared in 9.78 ppm with far low integral amount compared to other ones (Fig. S2b).


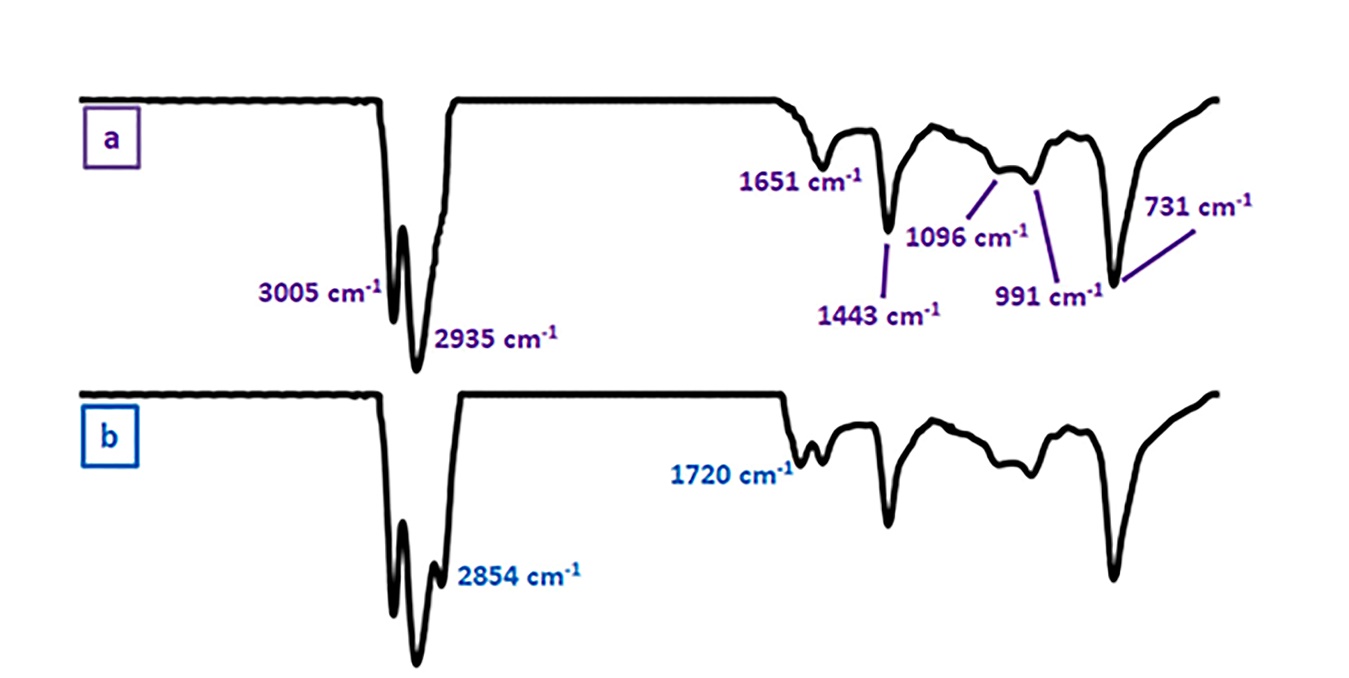

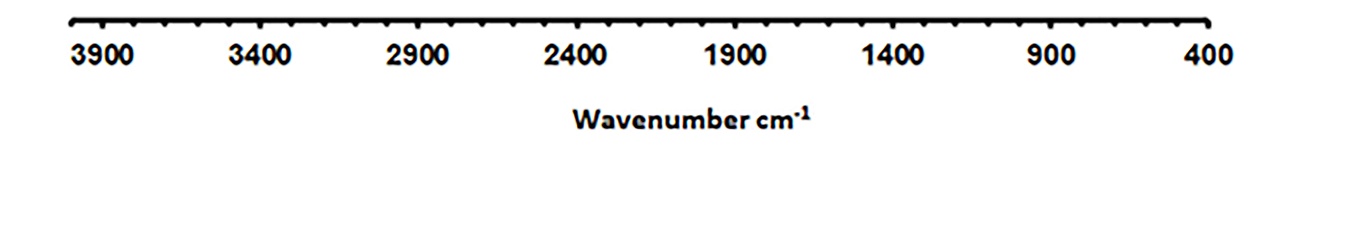

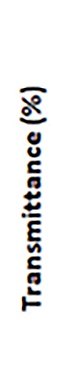


**Fig. S3.** FT-IR spectra. (a) PB, (b) Ald

According to Fig. S3a, C=C double bonds of the starting PB are contributed to a stretching absorption band at 1651 cm-1. =C-H moieties are shown a band at 3005 cm-1 for stretching vibration and bands at 991 and 1096 cm-1 for bending vibration. Strong absorption band at 2935 cm-1 is referred to C-H stretching vibration and band at 1443 cm-1 is appeared because of scissoring vibration of H-C-H bonds respectively. Fingerprint band at 731 cm-1 is attributed to major cis- 1,4 microstructure vibration and also stretching vibration of long chain methyl rock. Shoulder type absorption band of C-H stretching vibration at 2854 cm-1 and C=O stretching absorption band at 1720 cm-1 are emerged for presence of the aldehyde functional group (Fig. S3b).

**Fig. S4** FT-IR spectra. (a) Citric acid, (b) GQD

**3416 cm-1**

**781cm-1**


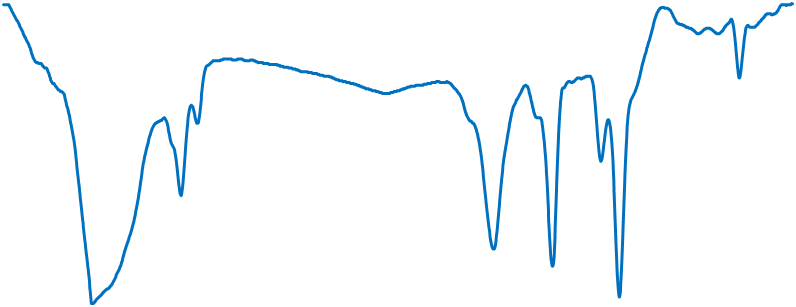

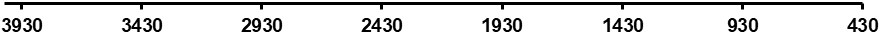


**Transmittance (%)**

**Wavenumber (cm-1)**

**(b)**


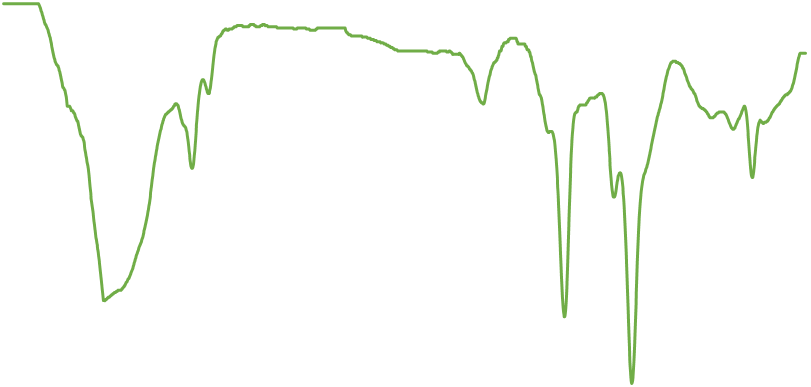


**(a)**

**3221 cm-1**

**2926 cm-1**

**1722 cm-1**

**1634 cm-1**

**1115 cm-1**

**1041 cm-1**

**625 cm-1**

Stretching vibrations of acid and alcohol O-H groups of citric acid are traced a strong absorption band at 3221 cm-1 in Fig. 4a that the twin-like shape of the absorbance my approve different nature of present OH groups. Stretching vibrations of acid C=O species are absorbed a band at 1722 cm-1. Absorbance bands of stretching vibrations of CH2 chain are recorded at 781 and 2926 cm-1 and C-O bond stretching vibration is shown up a band at 1115 cm-1.

According to the synthesis process, some acid and alcohol groups of citric acid remain as active functional groups on GQD; so, all absorption bands of citric acid also are emerged in GQD spectrum (Fig. 4b). The difference is that the intensity of acid C=O group is reflowed because of acid decomposition and acid functional group decrease. As well as, absorption band at 1634 cm-1 is related to the formation of benzene-like double bond structure of GQD.


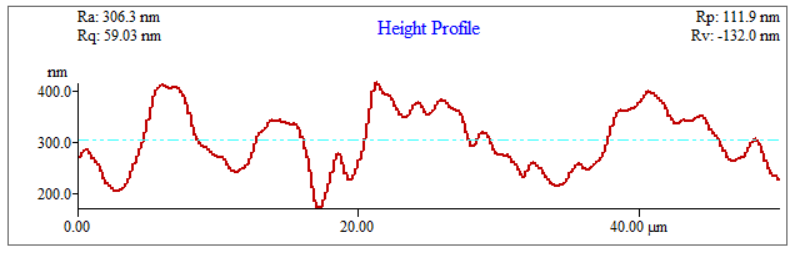

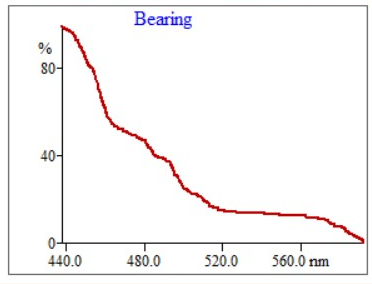

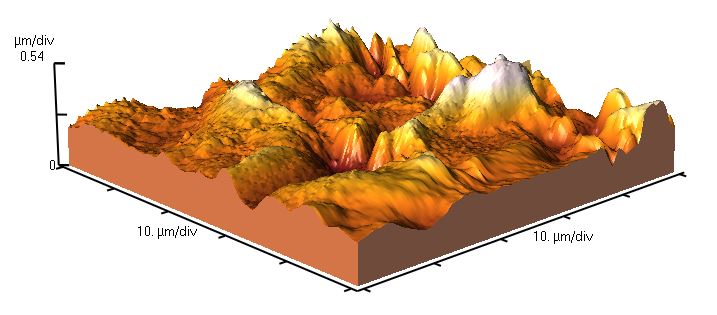

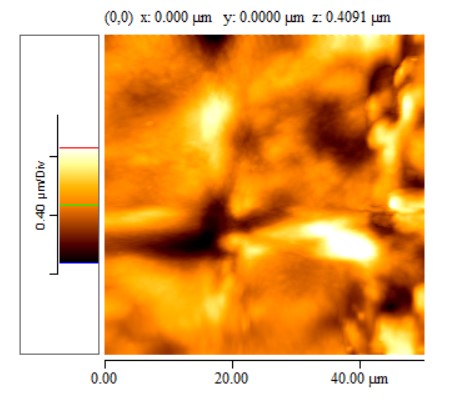

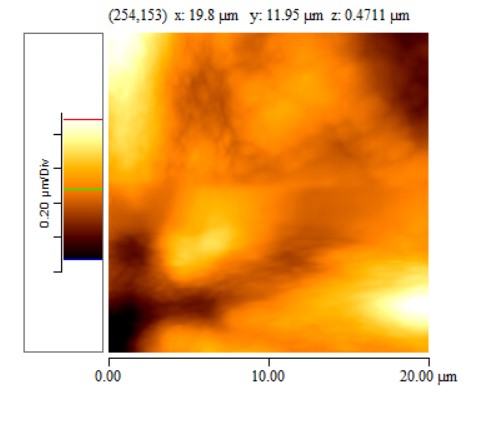

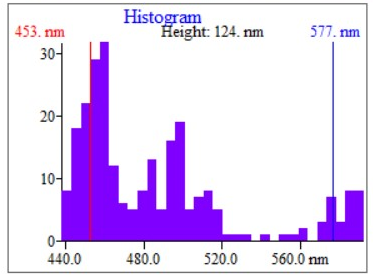


**(a)**

**(b) (c)**

**(d) (e)**

**(f)**

**Fig. S5** AFM images of PUr: (a) 3D scheme, (b) and (c) 2D images, (d) Height histogram, (e) Height distribution plot, (f) Roughness profile
